# Supplementary material
Source: PubMed Central journal article supplement (PMC4611502)
Supplement: ismej201546x5.pdf [file ismej201546x5.pdf]

**Supplementary Table 4:** Accessions, databases and types of environment for all *A. lacustris* related sequences that were incorporated in Figure 6 and Supplementary Figure 6

| Sequence / OTU                      | OTU size | Database | Accession (no. of reads)                                                                                                        | Environment                                                                          |
|-------------------------------------|----------|----------|---------------------------------------------------------------------------------------------------------------------------------|--------------------------------------------------------------------------------------|
| freshwater OTU 1                    | 2        | VAMPS    | RARE_NFF_Bv6v4 (1),<br>RARE_MSF_Bv6v4 (1)                                                                                       | Fresh water distribution system                                                      |
| freshwater OTU 2                    | 26       | VAMPS    | RARE_NFF_Bv6v4 (18),<br>RARE_MSF_Bv6v4 (6),<br>RARE_WHF_Bv6v4 (2)                                                               | Fresh water distribution system                                                      |
| freshwater OTU 3                    | 3        | VAMPS    | RARE_NFF_Bv6v4                                                                                                                  | Fresh water distribution system                                                      |
| freshwater OTU 4                    | 11       | SRA      | SRR305966 (6), SRR305967 (5)                                                                                                    | Lakes and streams near the Toolik Research Station                                   |
| freshwater OTU 5                    | 1        | SRA      | SRR305966                                                                                                                       | Lakes and streams near the Toolik Research Station                                   |
| freshwater OTU 6                    | 4        | SRA      | SRR305966 (3), SRR305967 (1)                                                                                                    | Lakes and streams near the Toolik Research Station                                   |
| freshwater OTU 7                    | 3        | SRA      | SRR305966 (2), SRR305967 (1)                                                                                                    | Lakes and streams near the Toolik Research Station                                   |
| freshwater OTU 8                    | 2        | SRA      | SRR305966 (1), SRR305967 (1)                                                                                                    | Lakes and streams near the Toolik Research Station                                   |
| freshwater OTU 9                    | 12       | SRA      | ERR204530 (4), ERR204548 (1),<br>ERR204613 (1), ERR204649 (1),<br>ERR204651 (1), ERR204690 (1),<br>ERR204702 (2), ERR204743 (1) | Fresh fruits and vegetables surfaces                                                 |
| freshwater OTU 10                   | 1        | SRA      | ERR204555                                                                                                                       | Fresh fruits and vegetables surfaces                                                 |
| UB <sup>1</sup> clone ELB16-030     | -        | NCBI-NT  | DQ015802.1                                                                                                                      | lake water, East Lobe at 16 m                                                        |
| UB <sup>1</sup> clone H06CH12_11_17 | -        | NCBI-NT  | HF558600.1                                                                                                                      | mine tailing material                                                                |
| UB <sup>1</sup> clone lp227         | -        | NCBI-NT  | KC332495.1                                                                                                                      | apple orchard                                                                        |
| UB <sup>1</sup> clone 69-34         | -        | NCBI-NT  | DQ833504.1                                                                                                                      | sediment of Guanting Reservoir                                                       |
| USB <sup>2</sup> clone bac2nit3     | -        | NCBI-NT  | EU861930.1                                                                                                                      | nitrogen amended dry meadow surface soil                                             |
| UAB <sup>3</sup> clone 5_28_E12_b   | -        | NCBI-NT  | JQ086827.1                                                                                                                      | push core sediment sample from the vadose zone of a hydrocarbon contaminated aquifer |
| UB <sup>1</sup> clone 300I E11      | -        | NCBI-NT  | AY662020.1                                                                                                                      | groundwater contaminated with high levels of nitric acid-bearing uranium waste       |

<sup>1</sup> UB = Uncultured bacterium

<sup>2</sup> USB = Uncultured soil bacterium

<sup>3</sup> UAB = Uncultured alphaproteobacterium
